# Supplementary material for: Nitrate Addition Increases the Activity of Microbial Nitrogen Removal in Freshwater Sediment
Source: MDPI journal article supplement (doi:10.3390/microorganisms10071429), 2022-07-15
Supplement: s1 [file s1]

# Supplementary Materials

Min Cai <sup>1</sup>, Yiguo Hong <sup>1</sup>, Jiapeng Wu <sup>1</sup>, Selina Sterup Moore <sup>2</sup>, Teofilo Vamerali <sup>2</sup>, Fei Ye <sup>1,\*</sup> and Yu Wang <sup>1,\*</sup>

<sup>1</sup> Institute of Environmental Research at Greater Bay Area, Key Laboratory for Water Quality and Conservation of the Pearl River Delta, Ministry of Education, Guangzhou University, Guangzhou 510006, China; 15883918123@163.com (M.C.); yghong@gzhu.edu.cn (Y.H.); wujiapeng@gzhu.edu.cn (J.W.)

<sup>2</sup> Department of Agronomy, Food, Natural Resources, Animals and Environment (DAFNAE), University of Padova, 35122 Padova, Italy; selina.moore@unipd.it (S.S.M.); teofilo.vamerali@unipd.it (T.V.)

\* Correspondence: yefei09007@gzhu.edu.cn (F.Y.); wangyu@gzhu.edu.cn (Y.W.)

## Additional Supporting Information

**Table S1** The primer sets and amplification conditions used in this study.

**Figure S1** Potential rates of (a) denitrification and (b) N<sub>2</sub>O production between three ponds under varying concentrations of NO<sub>3</sub><sup>-</sup> addition.

**Figure S2** Potential rates of denitrification between three ponds under varying concentrations of glucose addition.

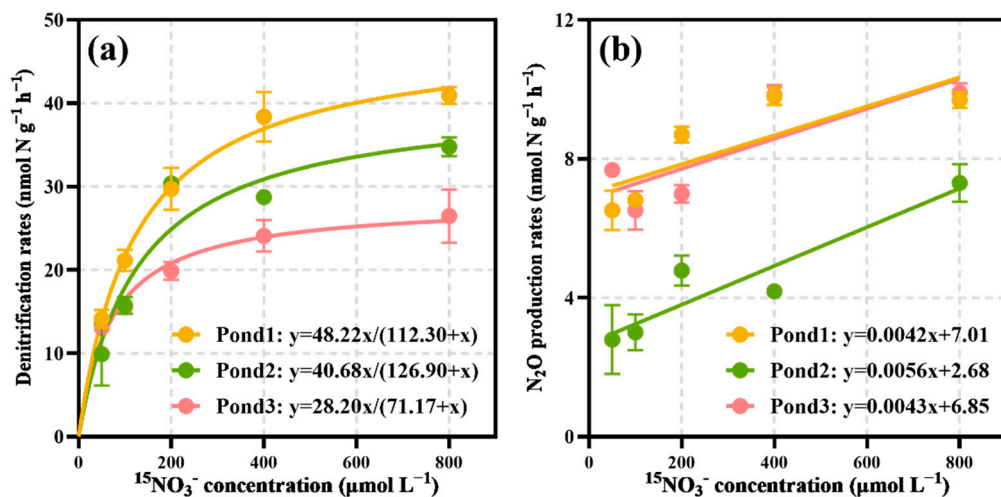

Figure S1. Potential rates of (a) denitrification and (b) N<sub>2</sub>O production between three ponds under varying concentrations of NO<sub>3</sub><sup>-</sup> addition.

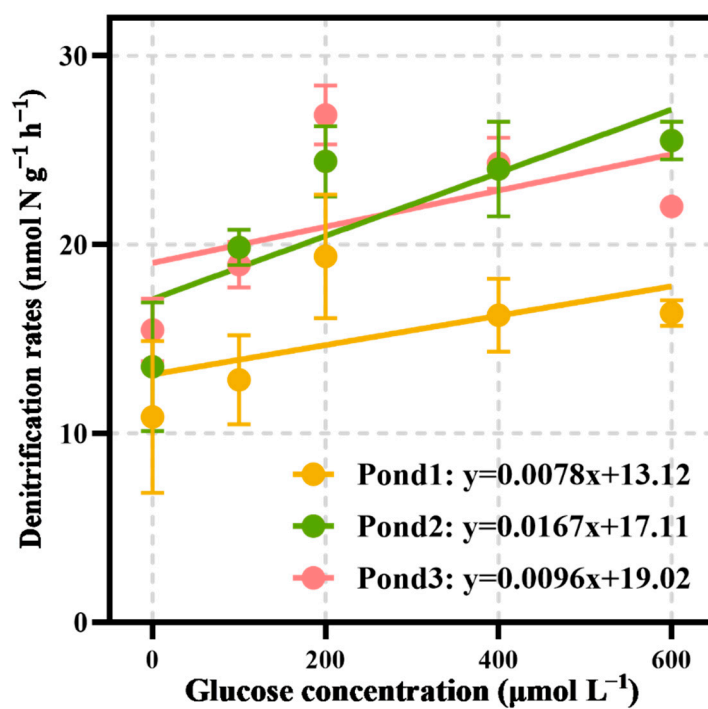

Figure S2. Potential rates of denitrification between three ponds under varying concentrations of glucose addition.

**Table S1.** The primer sets and amplification conditions used in this study.

| Target Gene         | Primer         | Primer Sequence (5'-3') | Size (bp) | qPCR Program                                                            | References |
|---------------------|----------------|-------------------------|-----------|-------------------------------------------------------------------------|------------|
| Anammox 16S<br>rRNA | 438F           | GTCRGGAGTTADGAAATG      | 246       | 95°C for 3 min, 40 ×<br>(95°C for 15 s, 56°C for 30 s, 72°C for 30 s)   | [1]        |
|                     | 684R           | ACCAGAAAGTTCCACTCTC     |           |                                                                         |            |
| <i>nirS</i>         | cd3aF          | GTSAACGTAAGGARACSGG     | 426       | 95°C for 10 min, 40 ×<br>(95°C for 15 s, 56°C for 45 s, 72°C for 45 s)  | [2]        |
|                     | R3cd           | GASTTCGGRTGSGTCTTGA     |           |                                                                         |            |
| <i>nirK</i>         | Flacu          | ATCATGGTSCTGCCGCG       | 473       | 95°C for 2 min, 36 ×<br>(95°C for 30 s, 56°C for 45 s, 72°C for 45 s)   | [3]        |
|                     | R3cu           | TTGGTGTRGACTAGCTCCG     |           |                                                                         |            |
| <i>nosZ</i> I       | <i>nosZ</i> 2F | CGCRACGGCAASAAGGTSMSST  | 267       | 95°C for 5 min, 40 ×<br>(95°C for 30 s, 68°C for 1 min, 72°C for 1 min) | [4]        |
|                     | <i>nosZ</i> 2R | CAKRTGCAKSGCRTGGCAGAA   |           |                                                                         |            |
| <i>nosZ</i> II      | <i>nosZ</i> F  | CTIGGICCIYTKCAYAC       | 746       | 95°C for 2 min, 40 ×<br>(95°C for 15 s, 60°C for 1 min, 72°C for 1 min) | [5]        |
|                     | <i>nosZ</i> R  | GCIGARCARAAITCBGTRC     |           |                                                                         |            |

## References

1. Han, P.; Gu, J.-D. More refined diversity of anammox bacteria recovered and distribution in different ecosystems. *Appl. Microbiol. Biotechnol.* **2013**, *97*, 3653–3663.
2. Yergeau, E.; Kang, S.; He, Z.; Zhou, J.; Kowalchuk, G.A. Functional microarray analysis of nitrogen and carbon cycling genes across an Antarctic latitudinal transect. *ISME J.* **2007**, *1*, 163–179.
3. Hallin, S.; Lindgren, P.E. PCR detection of genes encoding nitrite reductase in denitrifying bacteria. *Appl. Environ. Microbiol.* **1999**, *65*, 1652–1657.
4. Henry, S.; Bru, D.; Stres, B.; Hallet, S.; Philippot, L. Quantitative detection of the *nosZ* gene, encoding nitrous oxide reductase, and comparison of the abundances of 16S rRNA, *narG*, *nirK*, and *nosZ* genes in soils. *Appl. Environ. Microbiol.* **2006**, *72*, 5181–5189.
5. Jones, C.M.; Graf, D.R.H.; Bru, D.; Philippot, L.; Hallin, S. The unaccounted yet abundant nitrous oxide-reducing microbial community: a potential nitrous oxide sink. *ISME J.* **2013**, *7*, 417–426.
